# Supplementary material for: A highly selective colorimetric chemosensor for cobalt(ii) ions based on a tripodal amide ligand
Source: Royal Society of Chemistry journal article supplement (doi:10.1039/c4dt00776j), 2014-01-01
Supplement: c4dt00776j1.pdf [file c4dt00776j1.pdf]

Supporting Information

## A highly selective colorimetric chemosensor for cobalt(II) ion based on a tripodal amide ligand

Jing-Ru Zhou, Da-Peng Liu, Yue He, Xiang-Jian Kong,\* Zhi-Ming Zhang, Yan-Ping Ren,\* La-Sheng Long, Rong-Bin Huang, and Lan-Sun Zheng

### General Methods

$^1\text{H}$  NMR and  $^{13}\text{C}$  NMR spectra were recorded on a Bruker AV 500 NMR spectrometer.  $^1\text{H}$  NMR spectra were registered in  $\text{CDCl}_3$ , and chemical shifts are expressed in parts per million ( $\delta$ ) relative to internal  $\text{Me}_4\text{Si}$ . All coupling constants are absolute values and  $J$  values are expressed in Hertz (Hz). The description of signals include: s = singlet, bs = broad singlet, d = doublet, m = multiplet, dd = doublet of doublets. HR-MS spectra were recorded on a Bruker En Apex ultra 7.0T FT-MS apparatus. IR spectra were recorded on a Nicolet Avatar 360FT-IR spectrometer as KBr disks.

All reagents were of commercial origin and were used as received. Tetrahydrofuran (THF) was distilled prior to use from benzophenone. Silica gel (zhifu, 300-400 mesh) from Yantai silica gel factory (China) was used for column chromatography, eluting (unless otherwise stated) with ethyl acetate.

The acylating chlorination of the 5-(Methoxycarbonyl) Picolinic Acid was prepared as follows: The entire reaction vessel was dried to remove the water beforehand. At  $75\text{ }^\circ\text{C}$ , 10 mL (A.R.)  $\text{SOCl}_2$  was slowly added to the 5-(Methoxycarbonyl) picolinic Acid (0.543 g, 3 mmol). The solution was refluxed for 7 h at  $75\text{ }^\circ\text{C}$ . Excess thionyl chloride was then removed in vacuum under stirring to get the acid chloride.

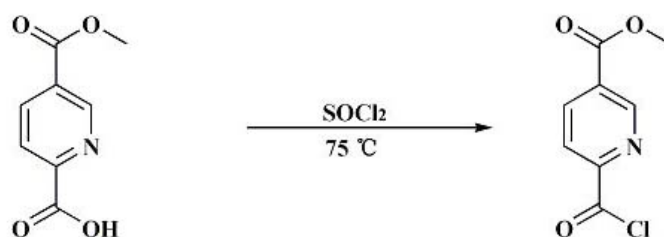

Figure S1. The acylating chlorination of the 5-(Methoxycarbonyl) picolinic Acid

The detailed synthesis method of Tris{2-carbamoyl-(5-carbomethoxy-pyridine-2) ethyl}amine (**H<sub>3</sub>L**, **1**): Et<sub>3</sub>N (0.5 mL , to remove excess acid) was added to a dry flask filled with acid chloride (0.597 g, 3 mmol) was added in anhydrous THF (30 mL) slowly under N<sub>2</sub> protection, then Tris(2-aminoethyl)amine (0.15 ml, 1 mmol) was added dropwise. The solution turned yellow. The solution stirred for 24 h under room temperature. Then saturated aqueous NH<sub>4</sub>Cl (10 mL) was added and the solution was extracted with CH<sub>2</sub>Cl<sub>2</sub> (3 × 30 mL). The combined organic layers were washed with brine, dried over anhydrous Na<sub>2</sub>SO<sub>4</sub>, and filtered. After concentration in vacuum, the residue was purified by flash chromatography on silica gel with CH<sub>3</sub>COOC<sub>2</sub>H<sub>5</sub> to afford **H<sub>3</sub>L** as a colorless solid in a 40 % yield.

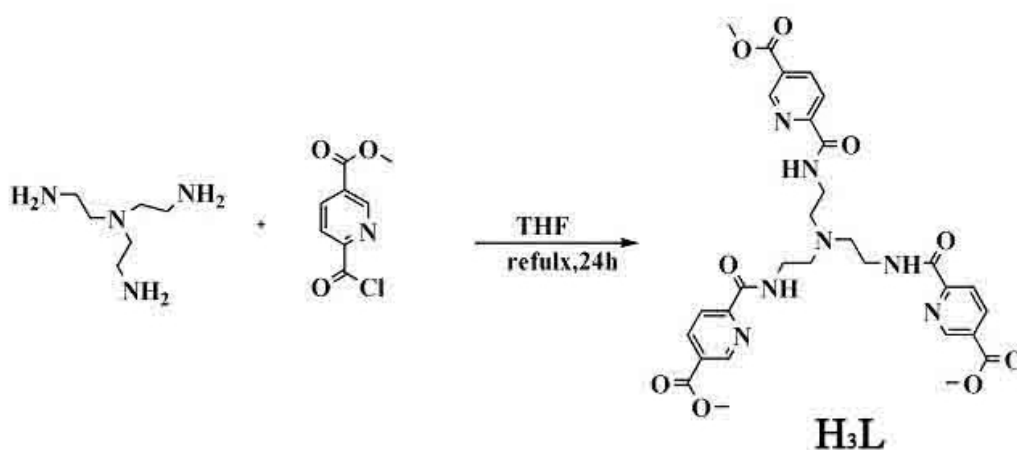

Figure S2. Synthesis of Tris{2-carbamoyl-(5-carbomethoxy-pyridine-2)ethyl}amine (**H<sub>3</sub>L**, **1**)

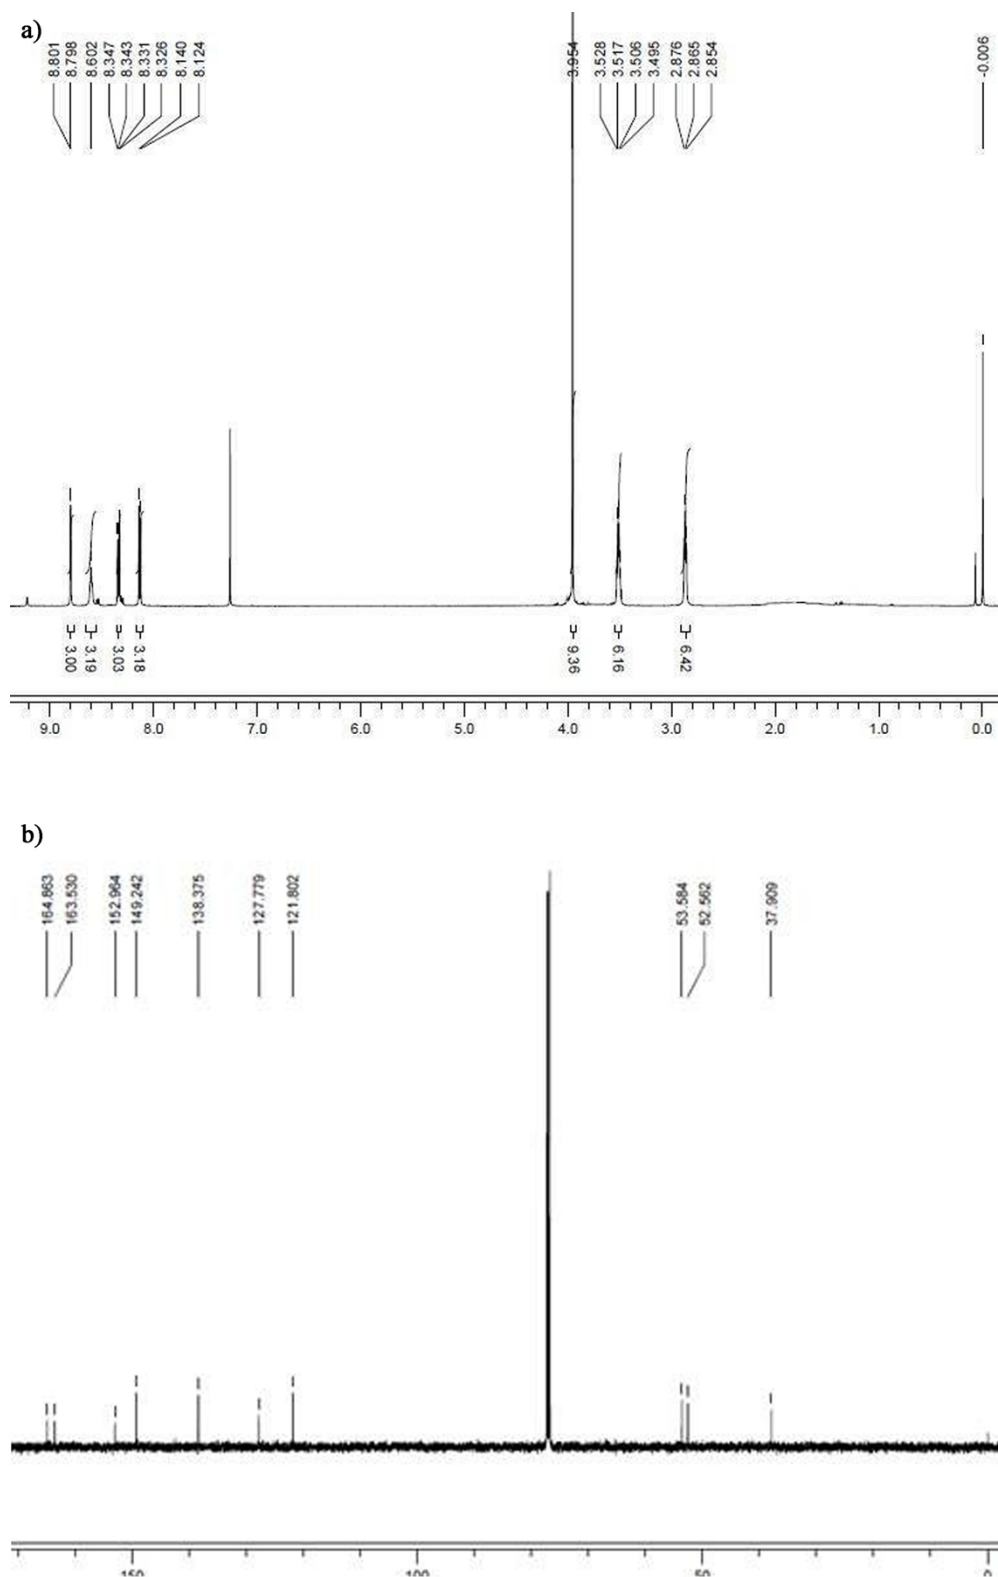

Figure S3. a) <sup>1</sup>H NMR spectrum of (H<sub>3</sub>L, **1**) (up); b) <sup>13</sup>C NMR spectrum of (H<sub>3</sub>L, **1**) (down).

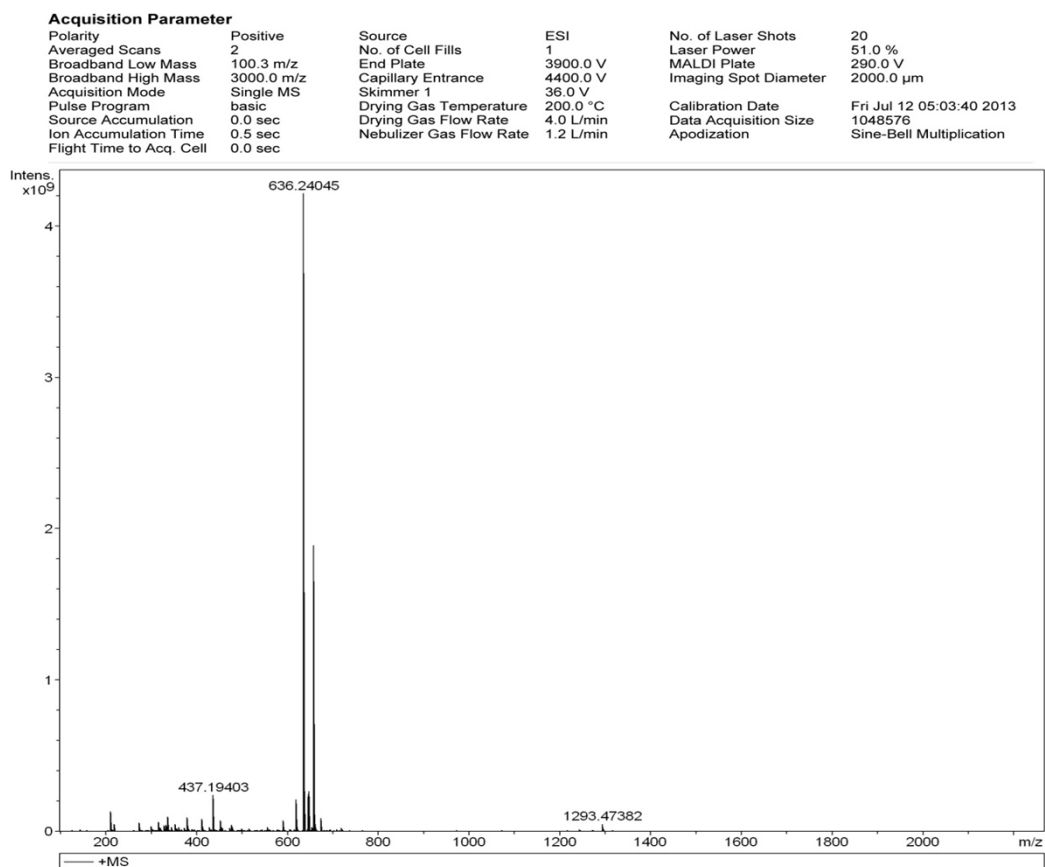

Figure S4. HR-MS spectrum of the ligand ( $\text{H}_3\text{L}$ , **1**).

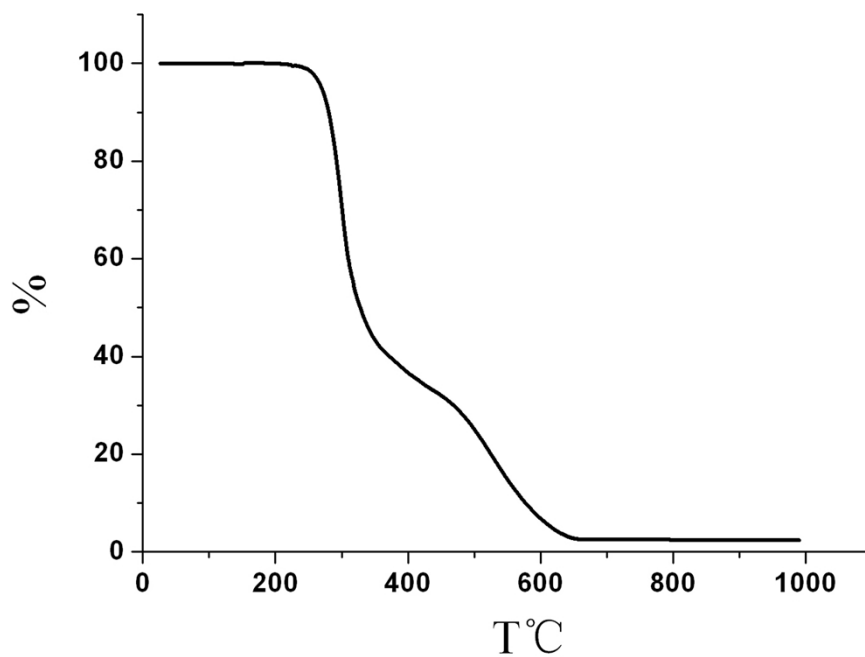

Figure S5. TGA curve of the ligand ( $\text{H}_3\text{L}$ , **1**).

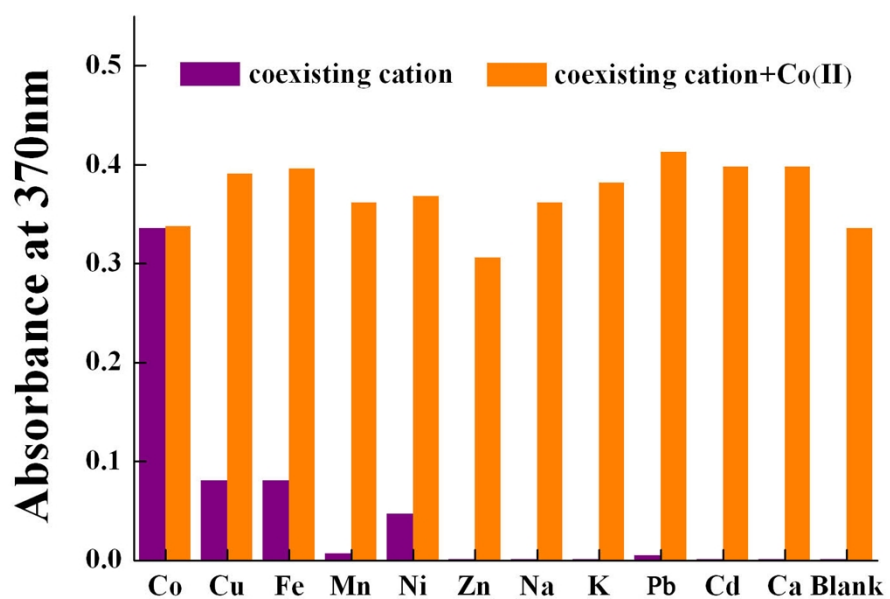

Figure S6. Column chart of the UV-vis absorbance measured at 370 nm of the  $\text{H}_3\text{L}$  solutions in the presence of different metal ions. (The absorbance of the  $\text{H}_3\text{L}$  solution was defined as zero, all the metal ions were added as their perchlorate salts, the blank means  $\text{H}_3\text{L}$  solution, all the metal ions were added equivalent to the  $\text{H}_3\text{L}$ )

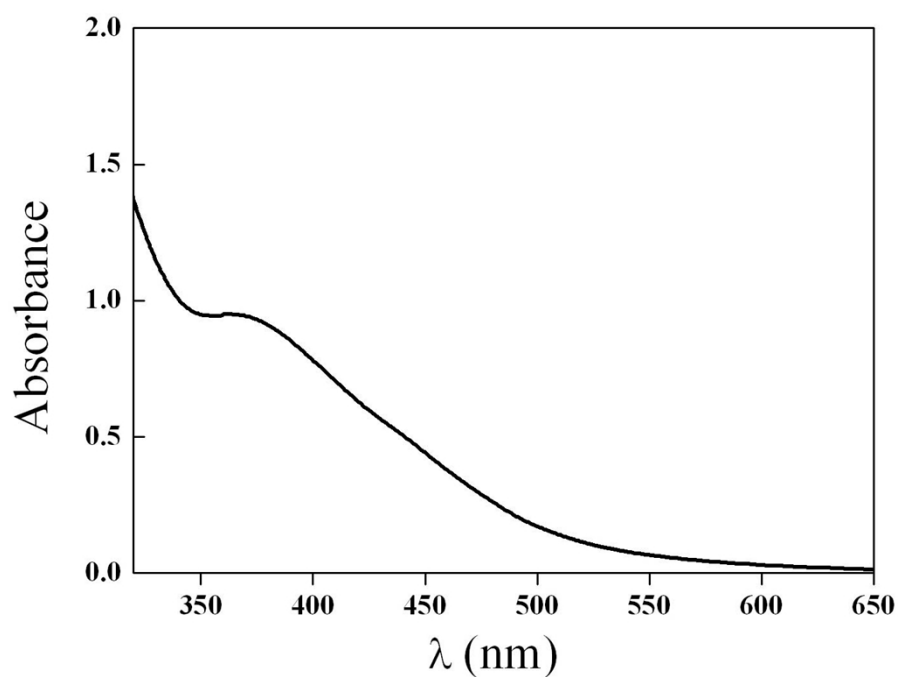

Figure S7. UV-vis spectrum of the aqueous solution of crystal  $\text{CoL}$  at a concentration of  $2.46 \times 10^{-4}$  mol/L. The peak of the spectrum centered at 370 nm. The solution was the same color as it showed in Figure 3 and Figure 8.

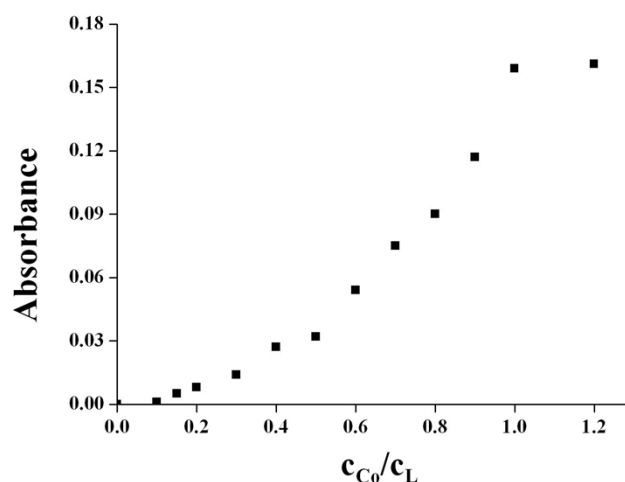

Figure S8. Changes in UV-vis spectrum of  $H_3L$  in DMSO/ $H_2O$  (50/1, v/v) solution ( $5 \times 10^{-5}$  mol/L) upon successive addition of  $Co^{2+}$  (0-1.2 equiv). The concentration of the  $Co^{2+}$  in the solution above is  $2.5 \times 10^{-6}$ ,  $4.9 \times 10^{-6}$ ,  $7.3 \times 10^{-6}$ ,  $9.6 \times 10^{-6}$ ,  $1.5 \times 10^{-5}$ ,  $2.0 \times 10^{-5}$ ,  $2.5 \times 10^{-5}$ ,  $3.0 \times 10^{-5}$ ,  $3.5 \times 10^{-5}$ ,  $4.0 \times 10^{-5}$ ,  $4.5 \times 10^{-5}$ ,  $4.9 \times 10^{-5}$ ,  $5.9 \times 10^{-5}$  mol/L, respectively (The absorbance of the  $H_3L$  solution was defined as zero, the  $Co^{2+}$  was added as its perchlorate salt).

## IR spectra

The IR spectrum of  $H_4L-NO_3$  has a much stronger absorption at  $1038\text{ cm}^{-1}$ , which is the specific peak of  $NO_3^-$ , and the absorption of  $1100\text{ cm}^{-1}$  means there exists  $ClO_4^-$  in the complex. The strong absorption at  $1655\text{ cm}^{-1}$  means there exists  $-NH$  in the  $H_3L$ , while the amide turned to be  $-NR$  in the complexes of **Co-Ac-HL** and **CoL**.

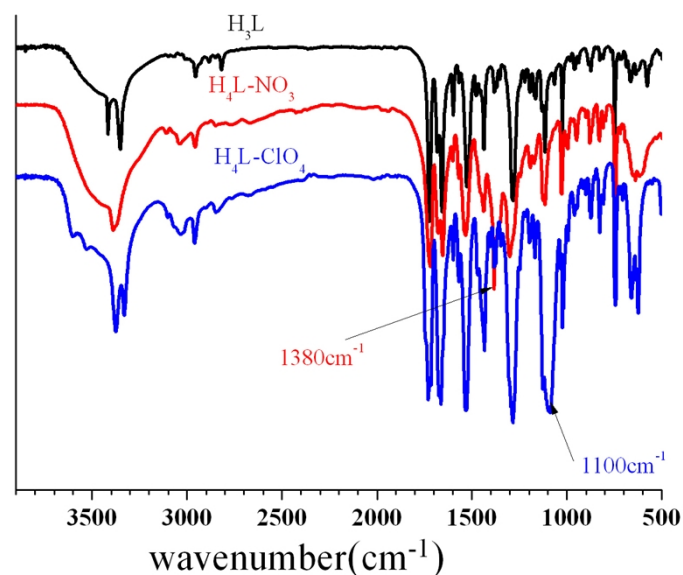

Figure S9. IR spectra of  $H_3L$ ,  $H_4L-NO_3$ ,  $H_4L-ClO_4$ .

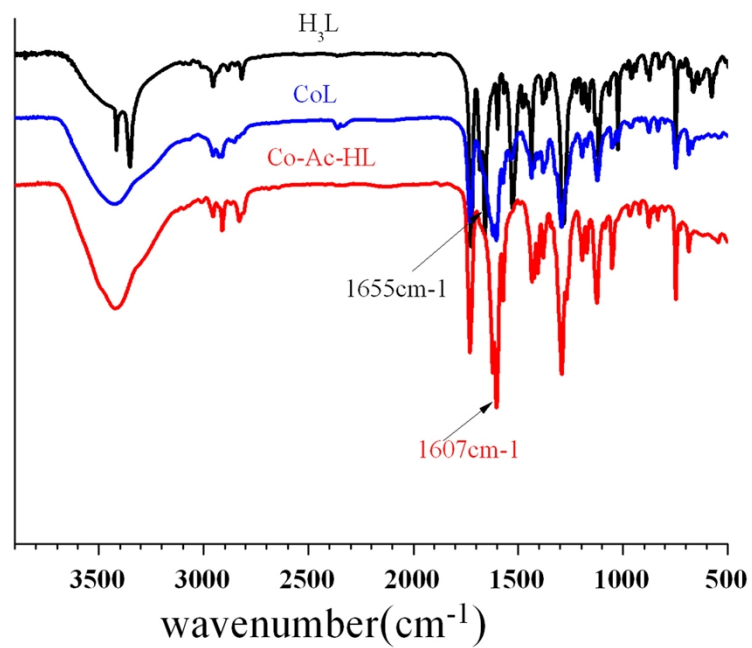

Figure S10. IR spectra of  $H_3L$ ,  $Co-Ac-HL$ ,  $CoL$ .

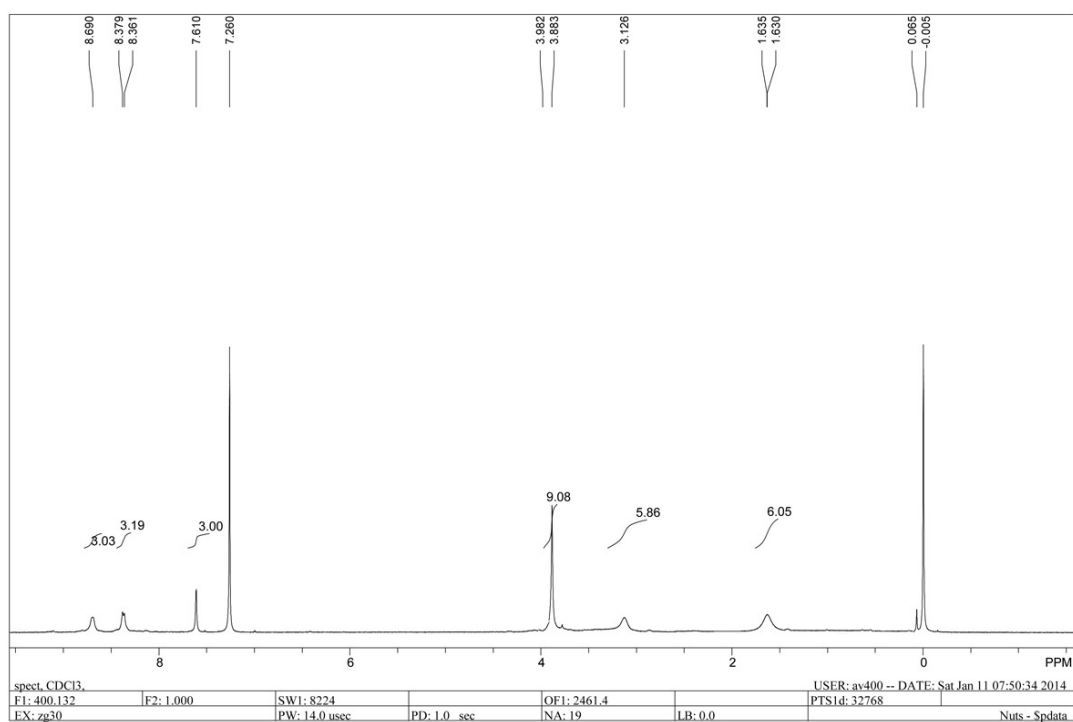

Figure S11.  $^1H$  NMR of  $(CoL, 2)$ . Comparing to the  $^1H$  NMR of  $H_3L$ , the H of amide  $\delta = 8.60$  (s, 3H) disappeared, all the other H experienced considerable highfield shifts, due to the six coordination of the center  $Co(III)$ .

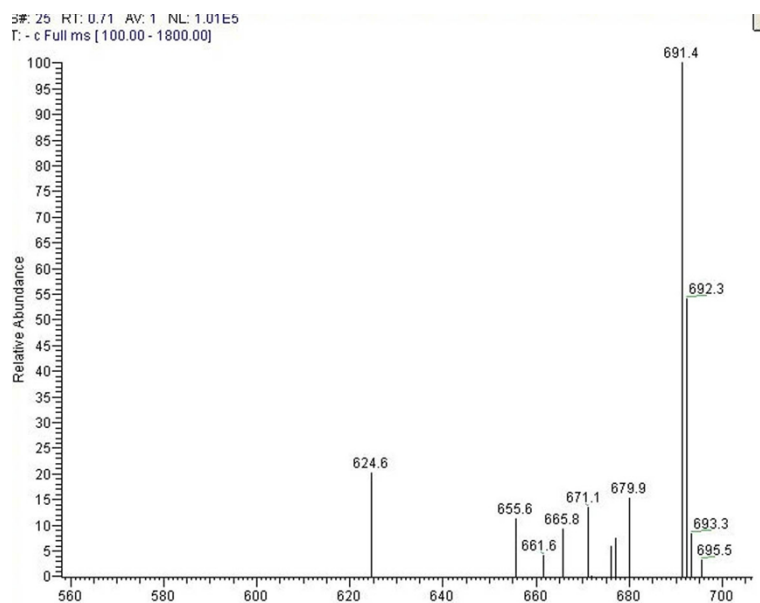

Figure S12. MS spectra of **CoL** ( $m/z = 691.4$ ).

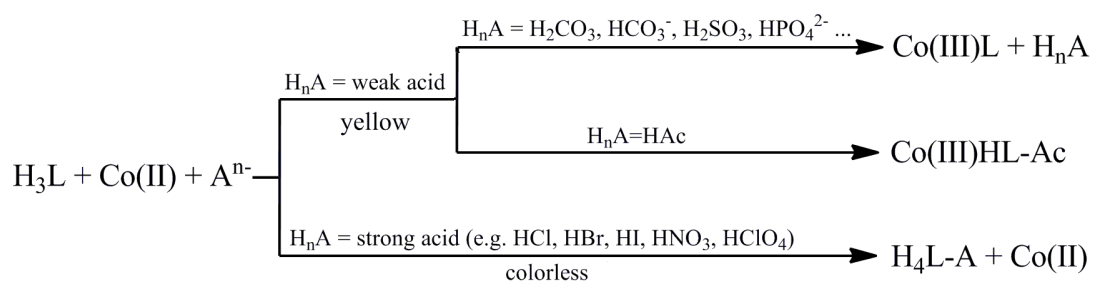

Figure S13. The interaction between cobalt (II) salt and **H<sub>3</sub>L**.
